# Supplementary material
Source: PubMed Central journal article supplement (PMC6127502)
Supplement: mmc2.pdf [file mmc2.pdf]

# Exosome-Mediated Small RNA Delivery: A Novel Therapeutic Approach for Inflammatory Lung Responses

Duo Zhang,<sup>1</sup> Heedoo Lee,<sup>1</sup> Xiaoyun Wang,<sup>2</sup> Ashish Rai,<sup>3</sup> Michael Groot,<sup>1</sup> and Yang Jin<sup>1</sup>

<sup>1</sup>Division of Pulmonary and Critical Care Medicine, Department of Medicine, Boston University Medical Campus, Boston, MA 02118, USA; <sup>2</sup>Brigham and Women's Hospital, Harvard Medical School, Boston, MA 02215, USA; <sup>3</sup>North Shore Medical Center, Salem Hospital, Boston, MA 01970, USA

**Exosomes (EXOs) are a type of extracellular nanovesicles released from living cells. Accumulating evidence suggests that EXOs are involved in the pathogenesis of human diseases, including lung conditions. In recent years, the potential of EXO-mediated drug delivery has gained increasing interest. In this report, we investigated whether inhaled EXOs serve as an efficient and practical delivery vehicle to activate or inhibit alveolar macrophages (AMs), subsequently modulating pulmonary immune responses. We first identified the recipient cells of the inhaled EXOs, which were labeled with PKH26. We found that only lung macrophages efficiently take up intratracheally instilled EXOs *in vivo*. Using modified calcium chloride-mediated transformation, we manipulated small RNA molecules in serum-derived EXOs, including siRNAs, microRNA (miRNA) mimics, and miRNA inhibitors. Via intratracheal instillation, we successfully delivered siRNA and miRNA mimics or inhibitors into lung macrophages using the serum-derived EXOs as vehicles. Furthermore, EXO siRNA or miRNA molecules are functional in modulating LPS-induced lung inflammation *in vivo*. Beneficially, serum-derived EXOs themselves do not trigger lung immune responses, adding more favorable features to serve as drug delivery agents. Collectively, we developed a novel protocol using serum-derived EXOs to deliver designated small RNA molecules into lung macrophages *in vivo*, potentially shedding light on future gene therapy of human lung diseases.**

## INTRODUCTION

Extracellular vesicles (EVs) are critical mediators involved in intercellular crosstalk and inter-organ communication.<sup>1–3</sup> They are derived from various cells and potentially transfer functional cellular content between “mother” cells to recipient cells.<sup>1–3</sup> Currently, three categories of EVs are classified based on their size, surface markers, and mode of biogenesis, including apoptotic bodies (ABs), microvesicles (MVs), and exosomes (EXOs).<sup>1–3</sup> Emerging evidence suggests that EXOs serve as vehicles for therapeutic drug delivery, such as small RNA or DNA molecules.<sup>4–6</sup> EXOs are endogenously generated by host cells and may serve as “nature’s delivery system.”<sup>7,8</sup> Presumably, EXOs trigger fewer immune responses and/or toxicity compared with exogenous nanoparticles.

Small RNAs, including small interfering RNA (siRNA) and microRNA (miRNA), are enormously promising for the development of therapeutic agents for human diseases.<sup>9–12</sup> siRNA is a chemically synthesized, short, double-stranded RNA (dsRNA) molecule 20–25 bp in length.<sup>9,10</sup> In contrast, miRNAs are endogenously encoded small non-coding RNAs that are crucial regulators of numerous biological processes, such as proliferation, differentiation, development, and cell death.<sup>11,12</sup> To induce post-transcriptional gene silencing, both siRNA and miRNA interact with and activate the RNA-induced silencing complex (RISC).<sup>13</sup> These small inhibitory RNA molecules guide the active RISC toward the target mRNAs to silence the designated genes via an endonuclease, Argonaute 2 (AGO2).<sup>14,15</sup> Recently, therapeutic approaches using siRNAs and/or miRNAs have been extensively investigated, and many RNAi-based drugs have entered clinical trials.<sup>16–18</sup> Biopharmaceutical companies are investing a lot of effort to bring small RNA therapeutic agents to the market.

The delivery of a therapeutic siRNA or miRNA to its target tissue or cell is a challenging task that becomes more difficult when delivering siRNA or miRNA into the lungs via inhalation or intratracheal (i.t.) instillation. Inhaled delivery of therapeutic agents is the first-line treatment of various lung diseases. The effectiveness of inhaled therapeutics is closely related to the recipient cells, the amount of drug uptake by the recipient cells, and the kinetics of drug distribution.<sup>19,20</sup> The essential factors affecting the efficacy of an inhaled drug also include respiratory tract geometry, breathing pattern, aerosol properties (such as particle size, shape, density, etc.), and mucociliary clearance.<sup>19,20</sup> As a novel finding, we describe the delivery of inhaled small RNA molecules into the lungs using host-derived EXOs.

In our study, we employed serum-derived EXOs as oligonucleotide delivery vehicles and elucidate fundamental questions regarding

---

Received 6 December 2017; accepted 7 June 2018;  
<https://doi.org/10.1016/j.jymthe.2018.06.007>.

**Correspondence:** Yang Jin, Division of Pulmonary and Critical Care Medicine, Department of Medicine, Boston University Medical Campus, Boston, MA 02118, USA.

**E-mail:** [yjin1@bu.edu](mailto:yjin1@bu.edu)

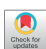

the character of EXOs, the recipient cells in lung tissues after i.t. instillation, and the capacity to transport functional small RNAs. We developed an efficient delivery system targeting lung macrophages using serum-derived EXOs. We also demonstrated an effective approach to treating inflammatory lung responses using therapeutic siRNAs or miRNAs delivered in an EXO-mediated manner.

## RESULTS

### Characterization of EXOs Derived from Mouse Serum

Serum has the potential to provide an unlimited source of EXOs, which are used as vehicles to deliver small RNA molecules. Therefore, we purified EXOs from mouse serum using total EXO isolation reagent as described in [Materials and Methods](#). We first characterized the serum EXOs according to the minimal experimental requirements for extracellular vesicles as defined by the International Society for Extracellular Vesicles.<sup>21</sup> The pictures captured using transmission electron microscopy (TEM) show particles with typical serum exosomal morphology, as published before ([Figure 1A](#)).<sup>22</sup> We also detected traditional positive and negative exosomal markers as well as markers for potential contaminants, such as albumin and lipoproteins ([Figure 1B](#)). Nanoparticle tracking analysis (NTA) measurement revealed that the purified serum EXOs were approximately 130 nm in diameter, which is the expected size of EXOs. The concentration of mouse serum EXOs was about  $2.08 \times 10^{12}$  particles/mL ([Figure 1C](#)). The size distribution was also confirmed using dynamic light scattering (DLS) ([Figure 1D](#)). We next determined the cellular origin of serum EXOs using cell-specific markers as described previously.<sup>23,24</sup> As shown in [Figure 1E](#), we found that serum EXOs were heterogeneous and derived from multiple different types of cells. Using western blot analysis, we detected a variety of cell markers on the isolated serum EXOs, including markers of epithelial cells (E-cadherin), endothelial cell (CD31), leukocytes (CD45), erythrocytes (CD235a), and platelets (CD41 and CD61).

### Effects of Serum EXOs on Primary AMs

The goal of this study was to develop a practical and efficient method to deliver small RNA molecules into alveolar macrophages (AMs) *in vivo*. Prior to using serum EXOs as a siRNA/miRNA delivery vehicle, we examined whether the serum EXOs exert cytotoxic or immunogenic effects on primary AMs. No significant cytotoxic responses were observed in primary AMs after exposure to serum EXOs in a dose-dependent manner ([Figure 1F](#)). We next evaluated whether serum EXOs trigger inflammatory lung responses *in vivo*. Purified serum EXOs were given to wild-type (WT) mice via i.t. instillation in a dose-dependent manner. Lipopolysaccharide (LPS) administration was used as a positive control. Inflammatory responses were determined by analyzing broncho-alveolar lavage fluid (BALF) cell counts and differentials as well as the level of secreted cytokines. We observed that BALF cell counts and differentials were not significantly altered in the EXO-treated mice compared with control mice ([Figures 2A and 2B](#)). Furthermore, no significant difference was observed in secreted cytokine levels between the EXO-treated group and the control ([Figures 2C–2E](#)).

### AMs Efficiently Take Up Instilled Serum EXOs

Given that many different types of cells are present in the lung, we first identified the recipient cells of serum EXOs *in vivo*. Fluorescent PKH26-labeled EXOs were administrated i.t. to untreated WT mice. Co-localization between PKH26 (red) and anti-CD68 (green, a marker of monocyte lineage) were identified, indicating that serum EXOs directly interact with macrophages in the lung ([Figure 3A](#)). Consistently, after instillation of PKH26-labeled EXOs i.t., we found that the majority of PKH26-positive cells obtained from BALF were also CD45<sup>+</sup>F4/80<sup>+</sup>, which is reported to be an AM marker ([Figure 3B](#)).<sup>25</sup>

To further determine whether other phagocytes, such as neutrophils, also take up instilled EXOs in the same manner as macrophages, we delivered serum EXOs to both LPS-pretreated mice and PBS-treated mice (control). LPS induces neutrophil recruitment and activation in the lungs.<sup>26</sup> Intriguingly, PKH26-labeled EXO uptake was only found in CD68-positive cells ([Figure 3C](#)) but not in Ly-6G-positive ones ([Figure 3E](#)), suggesting that serum EXOs were primarily taken up by macrophages rather than neutrophils. Using fluorescence-activated cell sorting (FACS), we further analyzed the surface markers of cells that were PKH26-positive and, presumably, had taken up PKH26-labeled EXOs. Consistently, the PKH26-positive cells were CD45<sup>+</sup>F4/80<sup>+</sup> rather than Ly-6G-positive ([Figures 3D and 3F](#)). Additionally, to avoid false positive results caused by lipophilic dye labeling of vesicles, we repeated the *in vivo* experiments using Exo-Red, which stains the single-stranded RNA in EXOs. Similar results were observed in BALF cells and lung sections ([Figure S1](#)).

Next, we determined serum EXO uptake using cultured cells *in vitro*. PKH67-labeled EXOs and controls were added to the cultured cells. As early as 1 hr after incubation, the uptake of PKH67-labeled EXOs by macrophages was visualized using a fluorescence microscope. In contrast, positive green PKH67 fluorescence was not detected in a variety of non-macrophage cells, including many different types of epithelial cells, fibroblasts, and neutrophils ([Figure 3G](#)).

### Delivery of siRNA Using Serum EXOs

Above, we established the uptake of serum EXOs by lung macrophages and determined whether serum EXOs are safe to be used as delivery vehicles. We next evaluated the efficiency of siRNA delivery *in vivo* using an EXO-mediated manner. We also determined whether the EXO-delivered Myd88 siRNA exerts functional roles *in vivo*. Myd88 is a well-known signaling adaptor involved in innate immunity.<sup>27</sup> Myd88 siRNA was loaded into serum EXOs using modified calcium-mediated transfection, as described in our previous report.<sup>28</sup> We first quantified the copy number of Myd88 siRNA in each EXO after transfection. As shown in [Figure 4A](#), more than 200 copies of control siRNA or Myd88 siRNA per EXO were identified in transfected EXOs. To investigate whether the EXO-delivered Myd88 siRNA has functional activity *in vivo*, we performed the following experiments. C57BL/6J WT mice were given LPS i.t. Three hours later, control siRNA (siCon)/EXOs or siMyd88/EXOs were administrated i.t. into LPS-pretreated mice. We found that the expression of Myd88 in BALF macrophages was significantly decreased in the mice receiving siMyd88/EXOs. The expression

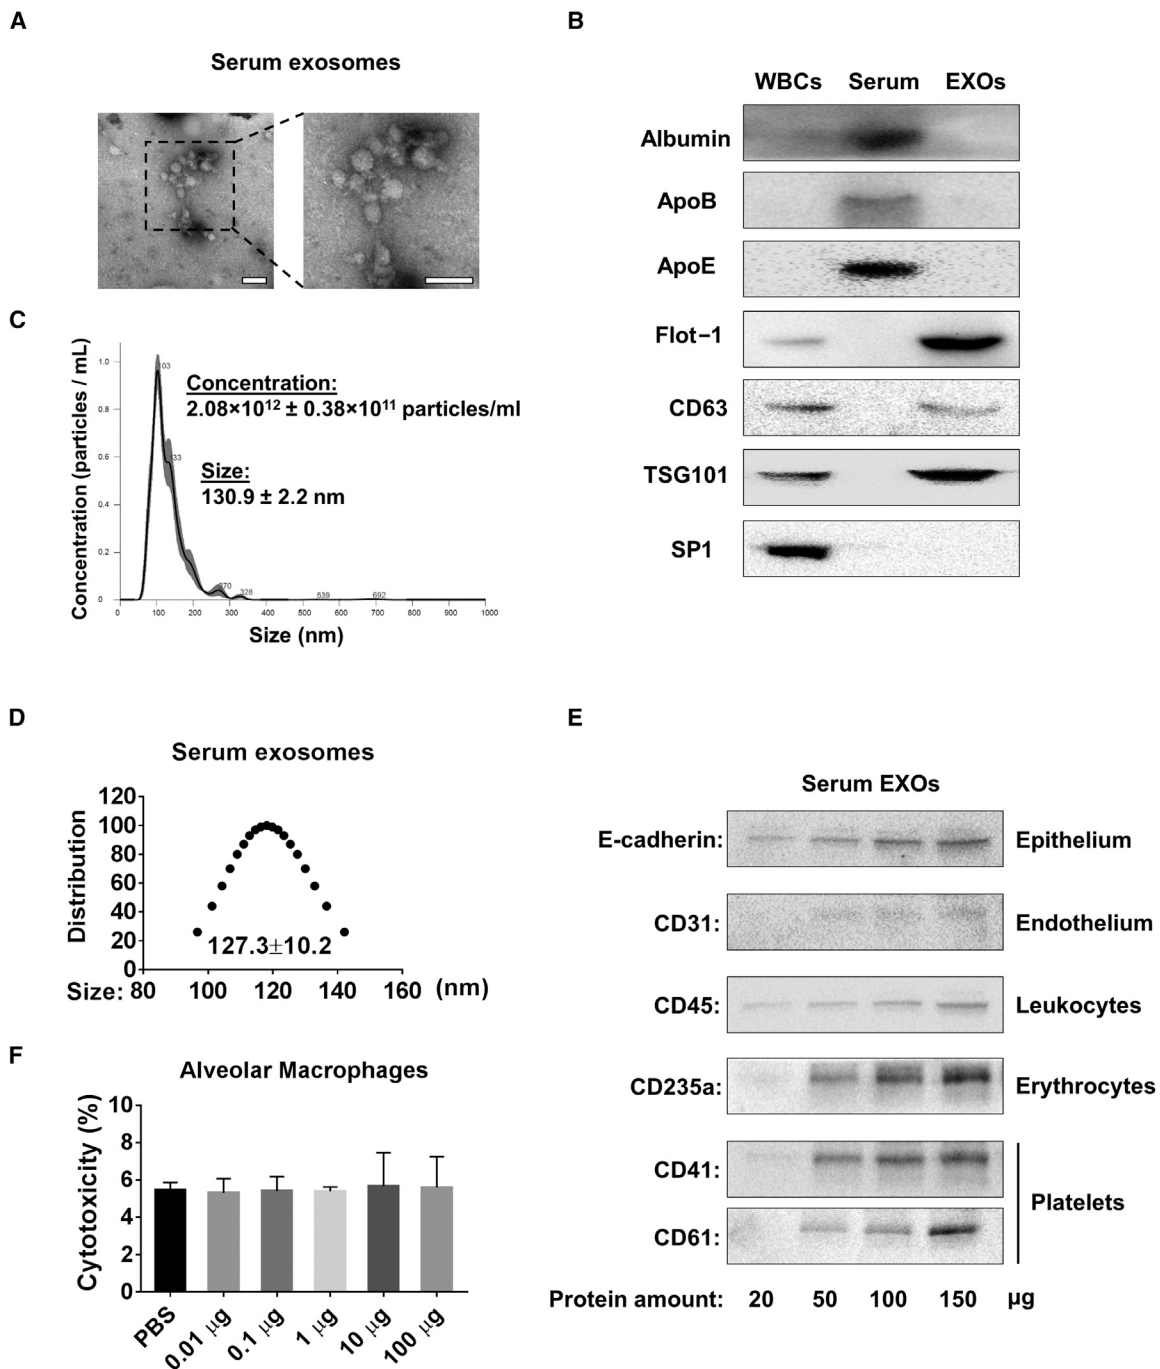

**Figure 1. Characterization of Serum-Derived EXOs**

(A) TEM images of serum EXOs isolated from C57BL/6J wild-type mice. Scale bars, 200 nm. (B) Exosomal positive markers (Flot-1, CD63, and TSG-101) and negative markers (Albumin, ApoB, ApoE, and Sp1) were detected in 100  $\mu$ g protein from white blood cells (WBCs), total serum, and serum EXOs using western blot. (C) The size and concentration profiles of serum EXOs were measured using NanoSight. (D) The size distribution of serum EXOs was measured using DLS. (E) Purified serum EXOs were subjected to western blot analysis to detect different protein markers. (F) Different amounts of serum EXOs were added to primary alveolar macrophages ( $1 \times 10^6$  cells) and incubated for 12 hr. Cytotoxicity was measured according to the manufacturer's instructions. Results represent mean  $\pm$  SD of 3 independent experiments.

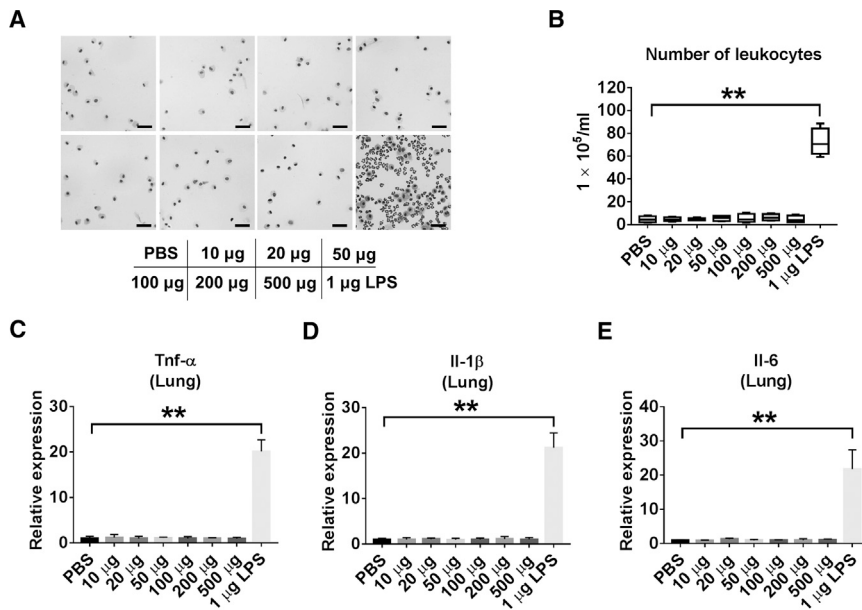

**Figure 2. Instillation of Serum EXOs Has No Pro-inflammatory Effect**

(A) C57BL/6J mice were given different amounts of serum EXOs (in 50  $\mu$ L PBS) or LPS (1  $\mu$ g in 50  $\mu$ L PBS), as indicated, via intratracheal instillation. Mice were sacrificed 1 day after treatment, and BALF cells were collected. Shown is H&E staining of BALF cells from each group ( $n = 4$  for each group). Scale bars, 50  $\mu$ m. (B) Total numbers of leukocytes were counted in the BALF. (C–E) The mRNA expression of TNF- $\alpha$  (C), IL-1 $\beta$  (D), and IL-6 (E) was detected in mouse lungs using real-time RT-PCR. \*\* $p < 0.01$ . Results represent mean  $\pm$  SD of 3 independent experiments.

of Myd88 was not altered in the BALF neutrophils (Figure 4B). We further observed a markedly decreased inflammatory cell count in the BALF obtained from siMyd88/EXO-treated mice after exposure to LPS. Using H&E staining, we observed much less cellular infiltration in lung tissue obtained from siMyd88/EXO-treated mice compared with siCon/EXO-treated mice in response to LPS (Figure 4C). Total cell counts of macrophages and neutrophils in siMyd88/EXO-treated mice were reduced significantly compared with the control group (Figure 4D). Moreover, the lung wet to dry weight ratio was robustly reduced in siMyd88/EXO-treated mice (Figure 4E). Using mouse cytokine array analysis, we showed that pro-inflammatory cytokines (tumor necrosis factor alpha [TNF- $\alpha$ ], interleukin-2 [IL-2], IL-3, IL-6, and granulocyte-macrophage colony-stimulating factor [GM-CSF]) and chemokines (CCL-2, MCP-5, and CCL-5) were significantly decreased in BALF obtained from siMyd88/EXO-treated mice (Figure 4F). The array data indicated that siMyd88/EXO has anti-inflammatory effects on both recruitment and activation of leukocytes. Consistently, mRNA expression of TNF- $\alpha$ , IL-1 $\beta$ , and IL-6 in the lung tissue was highly inhibited (Figure 4G). In addition, we observed that siMyd88/EXO instillation has inhibitory effects on the secretion of cytokines (TNF- $\alpha$ , IL-1 $\beta$ , and IL-6) and chemokines (CXCL1 and MIP-2) (Figures 4H–4L). These results suggest that the serum EXO-mediated delivery of Myd88 siRNA is successful and functional in recipient lung macrophages and attenuates LPS-induced lung inflammation. It has been reported that EXO membrane integrity is important in the delivery of small RNA.<sup>29,30</sup> Consistent results were observed when siRNA was delivered using lysed EXO (Figure S2).

#### Delivery of a miRNA Mimic or Inhibitor via Serum EXOs

In addition to siRNA, we next evaluated the delivery of a miRNA mimic via EXOs *in vivo*. We used miR-15a as an example in this study. MiR-15a confers an anti-inflammatory role via the TLR4

signaling pathway.<sup>31</sup> Here we evaluated whether EXO-delivered miR-15a attenuates LPS-induced lung inflammation *in vivo*. C57BL/6J WT mice were pretreated with LPS *i.t.* After 3 hr, LPS-pretreated mice were treated with an EXO-containing miR-15a mimic (mimic/EXO) or mimic control (miCon/EXO). We confirmed that mimic/EXO administration increased the level

of miR-15a in AMs obtained from BALF (Figure 5A). Administration of mimic/EXO resulted in a decreased total amount of macrophages and neutrophils in BALF compared with miCon/EXOs (Figures 5B and 5C). Furthermore, the expression of IL-1 $\beta$  and IL-6 was reduced in the mimic/EXO-treated group (Figure 5D). Using ELISA, we found that mimic/EXO treatment decreases the secretion of cytokines (IL-1 $\beta$  and IL-6) and chemokines (CXCL1 and MIP-2) (Figures 5E–5I). These results indicated that miR-15a-enriched EXOs were successfully delivered and exerted functions *in vivo*.

Additionally, we tested a miRNA inhibitor as a cargo of EXO-mediated delivery. miR-155 enhances pro-inflammatory responses in macrophages.<sup>32,33</sup> In our study, the delivery of miR-155 inhibitor-enriched EXOs (inhibitor/EXOs) decreased the level of miR-155 in sorted macrophages obtained from BALF compared with the group treated with inhibitor control-enriched EXOs (inCon/EXO). No significant effect on the level of miR-155 was found in neutrophils (Figure 6A), suggesting that macrophages were the primary target cells of EXO-mediated delivery. Inhibitor/EXO treatment decreased the macrophage and neutrophil counts in BALF and cell infiltration in lung tissue (Figures 6B and 6C). The mRNA expression of TNF- $\alpha$ , IL-1 $\beta$ , and IL-6 was significantly decreased in inhibitor/EXO-treated mice (Figure 6D). TNF- $\alpha$ , IL-1 $\beta$ , IL-6, CXCL1, and MIP-2 in BALF were significantly reduced after miR-155 inhibitor/EXO administration (Figures 6E–6I). These results were consistent with the reported functions of miR-155, suggesting that EXO-mediated delivery of miR-155 inhibitors *in vivo* was successful.

#### DISCUSSION

Development of an EXO-based drug delivery system has recently attracted increasing attention. EXOs belong to the family of EVs and fall into a similar size range as nanoparticles, with a diameter of around

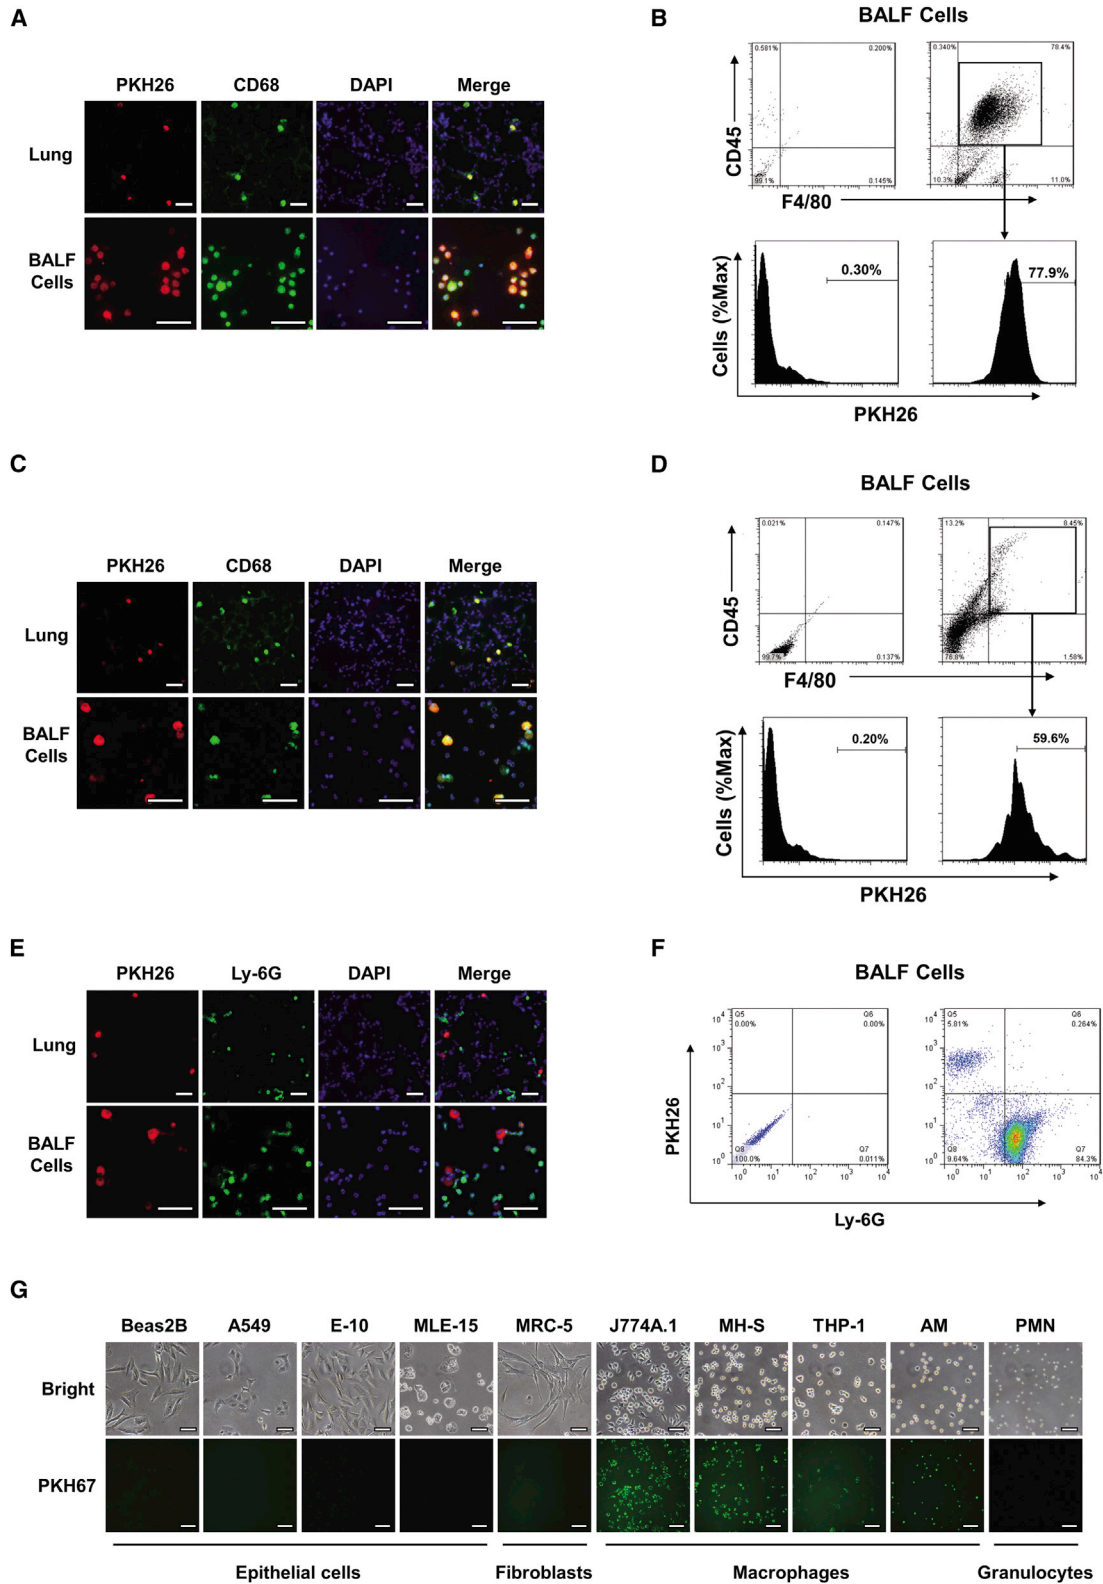

(legend on next page)

100 nm.<sup>1–3</sup> Currently, the general consensus is that “EXOs” means vesicles derived from multivesicular endosomes, and “MVs” means vesicles derived from the plasma membrane. In this report, the vesicles we used included both MVs and EXOs. However, based on size, we suspect that the majority of the vesicles probably fell into the category of EXOs. To simplify these terminologies, we used EXO here instead of EXO+MV. EXOs are secreted by the host cells and can be detected in a variety of body fluids, including BALF.<sup>1–3</sup> In the past couple of years, emerging interest has focused on the possibility of using EXOs as a novel delivery agent. Comparing with nanoparticles, liposomes, and viruses, EXO-mediated drug delivery has the following advantages. EXOs are produced endogenously; thus, they are potentially less toxic and less immunogenic compared with exogenous delivery vehicles.<sup>34,35</sup> EXOs have been shown to be a mode of transport across the blood-brain barrier (BBB).<sup>34,36</sup> Additionally, the potential to deliver therapeutic agents via EXOs in a cell type-specific manner is very attractive for gene therapy. Despite EXOs holding great promise as a breakthrough for gene therapy and drug delivery, there are numerous questions to be answered before knowledge-based delivery strategies can be developed. In this report, we addressed several of these unanswered questions. The novel findings in our report included delineating the target cells and the efficiency of EXO-mediated small RNA delivery via the i.t. route *in vivo*. We identified that macrophages are the main recipient cells when EXO RNA is delivered via inhalation (i.h.) or i.t. instillation. We also determined the copy numbers of the exogenous small RNA molecules loaded into each EXO. Furthermore, we confirmed that EXO-mediated delivery of small RNA molecules, including both miRNA oligos (inhibitors or mimics) and siRNAs, is functional *in vivo*. Moreover, we tested the probability of using serum-derived EXOs as a vehicle to deliver small RNA molecules to the lungs. The method of using serum-derived EXOs potentially provides sufficient host EXOs to be used in drug delivery *in vivo*. We confirmed that serum-derived EXOs are not cytotoxic or inflammogenic when delivered into the lungs.

Currently, the majority of reports associated with EXO-mediated drug delivery focus on cancer treatment. The anti-tumor agents are often incorporated into EXOs and delivered intravenously (i.v.). In contrast to the i.v. route, the pulmonary route provides many advantages and is a noninvasive method to deliver therapeutic agents for both local and systemic diseases and disorders. Currently, the delivery of EXO-based therapeutics via i.h. or i.t. remains unexplored. The distribution and target cells of i.t. administered EXOs are unclear. Therefore, our study potentially provides initial insight into the ki-

netics and recipient cells of EXO-mediated delivery to the lungs via i.h. or i.t.

EXOs are nanometer-sized membrane vesicles derived from living host cells.<sup>1–3</sup> Prior to the recognition of EXOs, a wide range of nanoparticles or nanoparticulate materials was developed for drug delivery, such as solid lipid nanoparticles, polymeric nanoparticles, and liposomes.<sup>37,38</sup> The application of a colloidal system for successful nebulization and i.t. instillation is challenging because of the difficulties of maintaining their critical physicochemical parameters.<sup>39,40</sup> The deposition of nanoparticles in the lungs depends on multiple physical and chemical factors, including, but not limited to, particle size, velocity, morphology, geometry, surface properties, and the three mechanisms of drug deposition in the respiratory system.<sup>39,40</sup> Impaction, sedimentation, and diffusion are well-established mechanisms of small-particle deposition in the respiratory system.<sup>40</sup> Particles with a size larger than 5  $\mu\text{m}$  are commonly deposited in the oropharynx and upper respiratory tract via impaction. Particles with a size between 1 to 5  $\mu\text{m}$  are often deposited in the bronchioles and small airways via sedimentation. Particles smaller than 100 to 500 nm are often deposited via diffusion in the alveoli, where Brownian motion plays an essential role. Nanoparticles and liposomes delivered via the i.t. route usually form aggregates, resulting in a size larger than 1  $\mu\text{m}$  and sediment in the bronchioles. In our studies, we found that i.t. instillation of EXOs led to the deposition of EXOs in alveolar regions (Figure 3) rather than in the bronchioles, where other nanoparticles, such as liposomes, tend to stay (Figure S3). The observed dispersion of EXOs into larger airways, bronchioles, and alveoli is probably caused by Brownian motion, which is consistent with previous reports.<sup>41</sup> Currently, liposomes are the prevalent vehicle for drug delivery. Because of their lipid bilayer shell, they can be loaded with nucleic acids and other small molecules. EXOs are also composed of a lipid bilayer with an aqueous inner layer and fall into similar size ranges as liposomes.<sup>1–3,39,40</sup> Besides having the advantages of liposomes, EXOs, having generated from host cells, have adapted to avoid detection by the immune system and are less likely to aggregate. Prevention of aggregation has been one of the challenges when liposomes are prepared for drug delivery.<sup>42,43</sup> Furthermore, the surface proteins of EXOs may facilitate uptake by specific cell types, adding a feature for cell type-specific delivery that current nano-sized delivery systems do not allow. Another advantage of EXO-mediated delivery is its high efficiency of intracellular drug delivery. EXOs have been shown to deliver molecules through the hard-to-cross BBB. This feature is probably due to

### Figure 3. Alveolar Macrophages Efficiently Take Up Instilled Serum EXOs

(A and B) Purified serum EXOs (100  $\mu\text{g}$  in 50  $\mu\text{L}$  PBS) labeled with PKH26 were administered to wild-type mice intratracheally (n = 4 for each group). After 24 hr, mice were sacrificed. Immunofluorescent staining of macrophages was performed in lung sections and BALF cells using an antibody against CD68 (a macrophage marker). The nuclei were stained with DAPI. Cells with red fluorescence indicate the uptake of PKH26 labeled EXOs. Scale bars, 100  $\mu\text{m}$  (A). BALF cells were isolated from EXO-treated wild-type mice as described above. FACS analysis of PKH26 positive cells was performed using an antibody against CD45 and F4/80 (B). (C–F) Mice were given LPS (1  $\mu\text{g}$  in 50  $\mu\text{L}$  PBS) intratracheally 3 hr before administration of PKH26-labeled EXOs (100  $\mu\text{g}$  in 50  $\mu\text{L}$  PBS) (n = 4 for each group). Mice were sacrificed 24 hr after EXO administration. Immunofluorescent staining was performed in lung sections and BALF cells using an antibody against CD68 (C) or Ly-6G (a neutrophil marker) (E). Scale bars, 100  $\mu\text{m}$ . BALF cells were subject to FACS analysis, and representative data were obtained using an antibody against CD45 and F4/80 (D) or Ly-6G (F). (G) Serum EXOs were labeled with PKH67 and added to the culture medium of cells as indicated. Pictures were taken using fluorescence microscopy after 2 hr of EXO incubation.

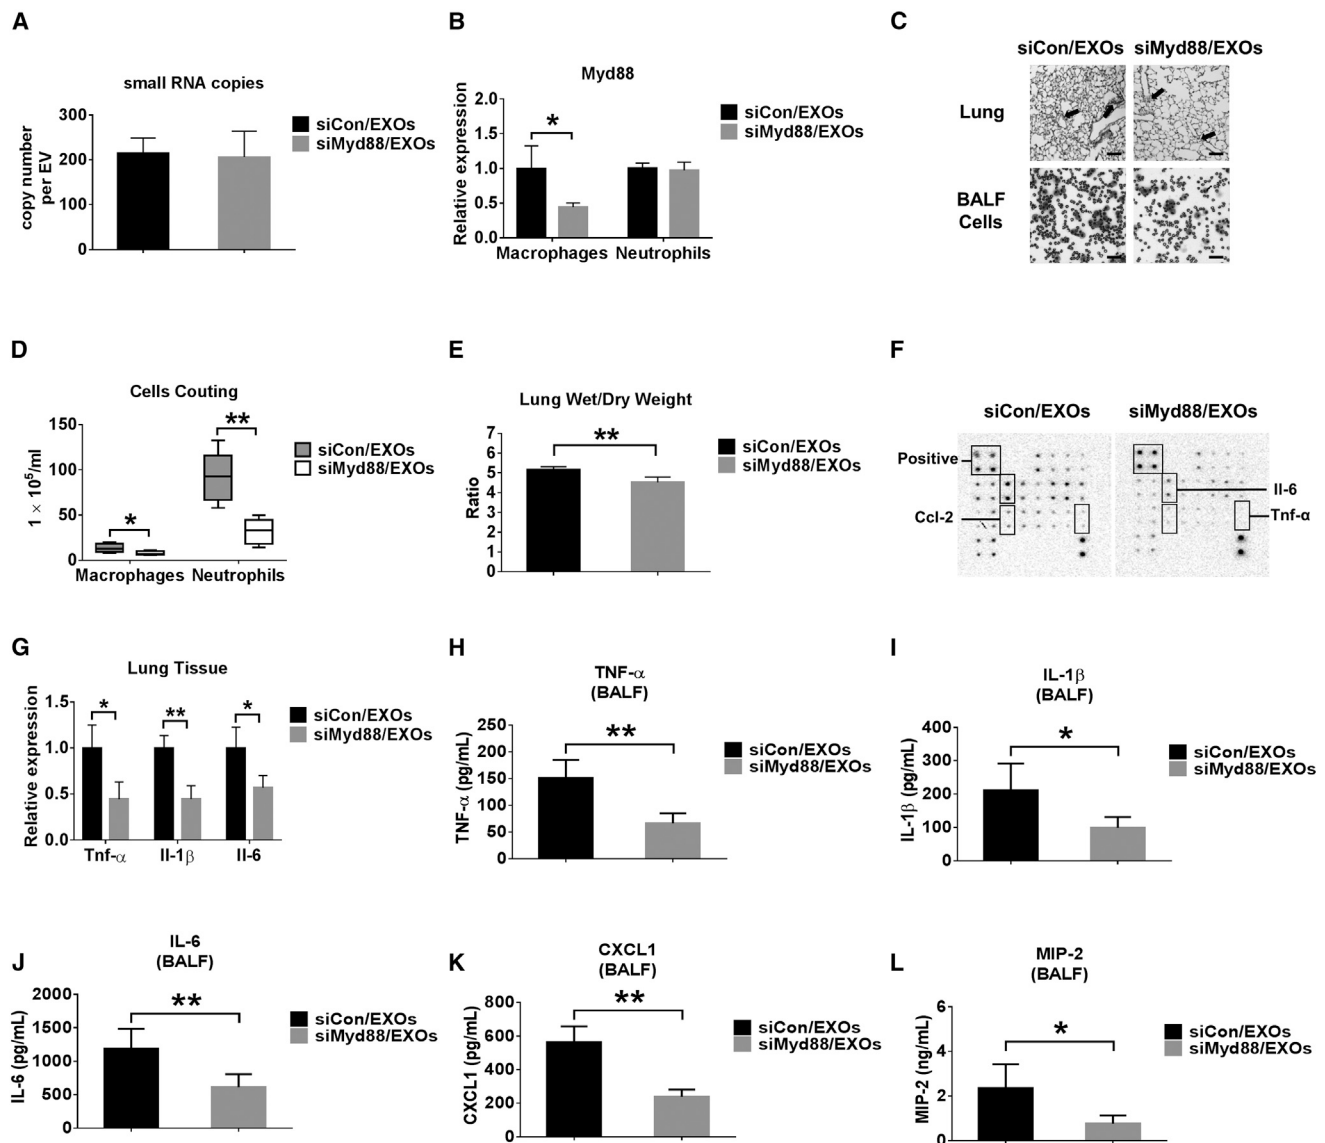

**Figure 4. Delivery of siMyd88 via Serum EXOs**

(A) 100 pmol control siRNA (siCon) or Myd88 siRNA (siMyd88) was introduced into 100  $\mu$ g serum EXOs using modified calcium-mediated transfection. The copy number of siCon or siMyd88 in each EXO was calculated using NanoSight and absolute real-time PCR. Results represent mean  $\pm$  SD of 3 independent experiments. (B–L) Wild-type mice were pretreated with 1  $\mu$ g LPS intratracheally. After 3 hr, mice were given siCon- or siMyd88-loaded serum EXOs ( $n = 4–6$  for each group). 24 hr later, the mRNA level of Myd88 in sorted macrophages (F4/80<sup>+</sup>CD11c<sup>+</sup>) and neutrophils (Ly-6G<sup>+</sup>CD11b<sup>+</sup>) was detected using real-time RT-PCR (B). H&E staining was performed using mouse lung section and BALF cells. Scale bars, 50  $\mu$ m (C). Differential cell counts were performed (D). Lung wet to dry weight ratios were calculated (E). A mouse cytokine array was used to detect cytokines released from BALF (F). Relative mRNA levels of TNF- $\alpha$ , IL-1 $\beta$ , and IL-6 in lung tissues were measured using real-time PCR (G). The secretion of TNF- $\alpha$  (H), IL-1 $\beta$  (I), IL-6 (J), CXCL1 (K), and MIP-2 (L) was detected using ELISA. Results represent means  $\pm$  SD. \* $p < 0.05$ , \*\* $p < 0.01$ .

EXOs carrying the same membrane components as the host, which is not a characteristic of synthetic liposomes.<sup>1–3,39,40</sup>

Despite the potential of delivering EXOs in a cell type-specific manner, we observed that AMs, along with newly recruited macrophages from the circulation, were the primary recipient cells of i.t. delivered EXOs (Figure 3). Curiously, only macrophages, but not

other phagocytes, including neutrophils, take up the inhaled EXOs (Figure 3). The serum-derived EXOs we used in this study are heterogeneous and derived from red cells, polynuclear cells, platelets, and other immune cells. No specific cell markers were dominant in the mixture of serum-derived EXOs. Macrophage-mediated phagocytosis is the most important and may be responsible for the clearance of EXOs deposited in the alveolar space in this study. However, in the

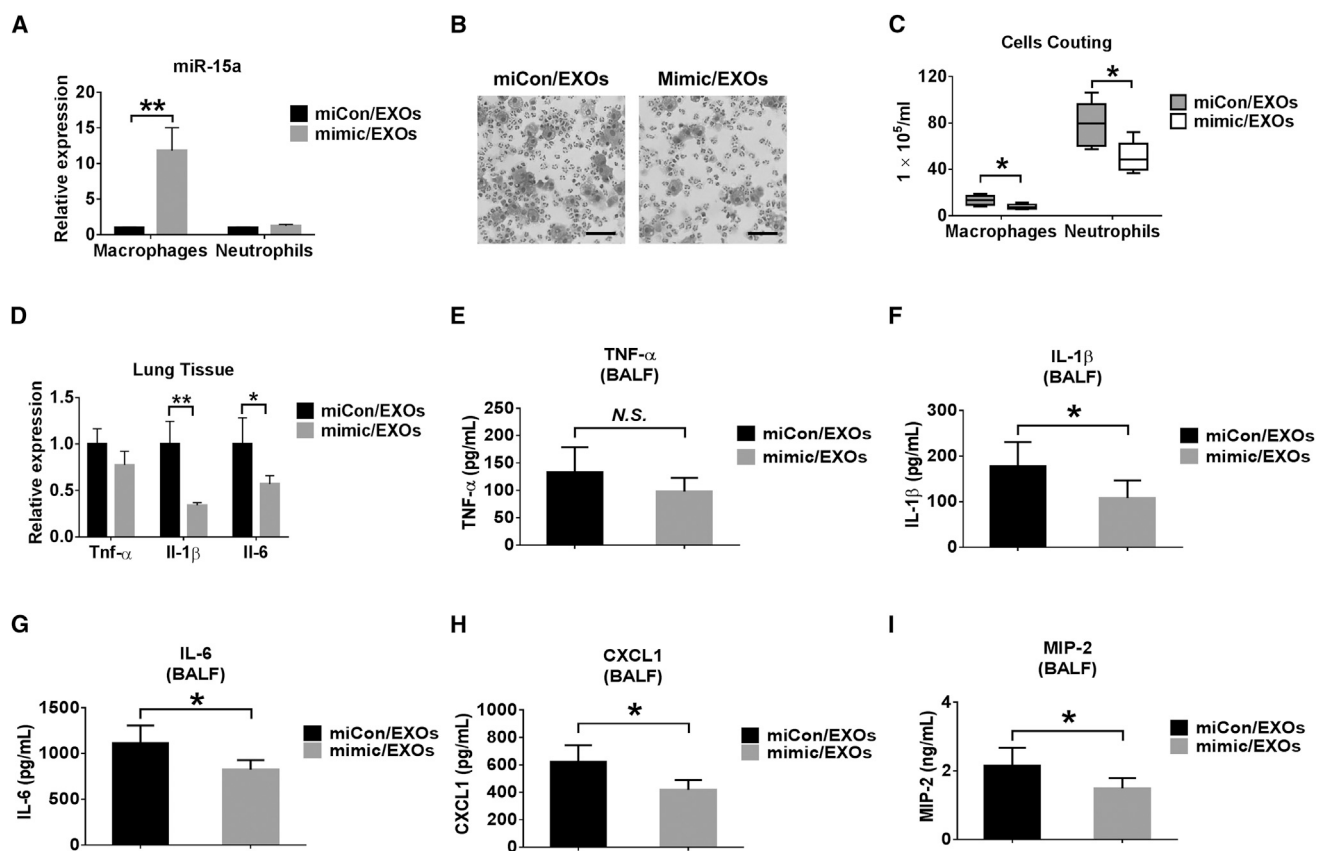

**Figure 5. Delivery of miRNA Mimic via Serum EXOs**

(A–I) Mice were pretreated with 1  $\mu$ g LPS intratracheally. After 3 hr, 100  $\mu$ g serum EXOs transfected with 100 pmol mimic control (miCon/EXOs) or miR-15a mimic (mimic/EXOs) were given to each mouse (n = 4–6 for each group). 24 hr later, the level of miR-15a was detected in sorted macrophages and neutrophils from BALF cells (A). H&E staining was performed using BALF cells (B). Scale bars, 50  $\mu$ m. The number of macrophages or neutrophils in BALF was counted (C). Relative mRNA levels of TNF- $\alpha$ , IL-1 $\beta$ , and IL-6 in the lung were measured (D). The secretion of TNF- $\alpha$  (E), IL-1 $\beta$  (F), IL-6 (G), CXCL1 (H), and MIP-2 (I) was detected using ELISA. Results represent means  $\pm$  SD. \*p < 0.05, \*\*p < 0.01.

presence of LPS stimulation, the uptake of EXOs by macrophages, but not by LPS-activated neutrophils, suggests that surface protein-mediated endocytosis plays a pivotal role in this process. In fact, previous reports have revealed that liposomes delivered *in vivo* are taken up mainly by macrophages, similarly to what we observed with EXO delivery. Lectin receptors, scavenger receptors, Fc receptors, and adhesion molecules that reside on the surface of macrophages potentially facilitate the endocytosis of EXOs and liposomes.<sup>44,45</sup> Apparently, some of these essential surface molecules are missing in phagocytes other than macrophages. This hypothetical explanation will require further exploration.

Our study is an initial investigation of EXO-mediated drug delivery in the lungs via the i.t. route. There are many details that remain to be addressed. First, our study only focused on the delivery of small RNA molecules, including miRNAs and siRNAs. Whether EXO-containing lipid, protein, or other chemical molecules can be delivered and be functional in the lungs *in vivo* remains unclear. One of the

challenges is to load and quantify the desired molecules into EXOs successfully and efficiently. Second, with the emergence of novel technology in the near future, we anticipate that single EXO sorting using FACS will be available and that we will be better able to characterize the distinct components of the serum-derived EXO mixture. Third, to achieve inhaled EXO-mediated drug delivery in other lung cells, such as epithelial cells, we will have to develop a method to avoid uptake of EXOs by macrophages residing in the alveoli.

In summary, we developed a novel protocol to use serum-derived EXOs as a vehicle to deliver small RNA molecules into the lung macrophages *in vivo*, i.t. We quantified the loaded exogenous RNA molecules in each EXO. We also confirmed with our current method that the EXO-containing small RNA molecules exerted functional roles in the lungs *in vivo*. The serum-derived EXOs are non-toxic and do not trigger an immune response; thus, they are safe to be used in mice *in vivo*. This report potentially sheds light on future gene therapy of human lung diseases via inhalational delivery using EXOs.



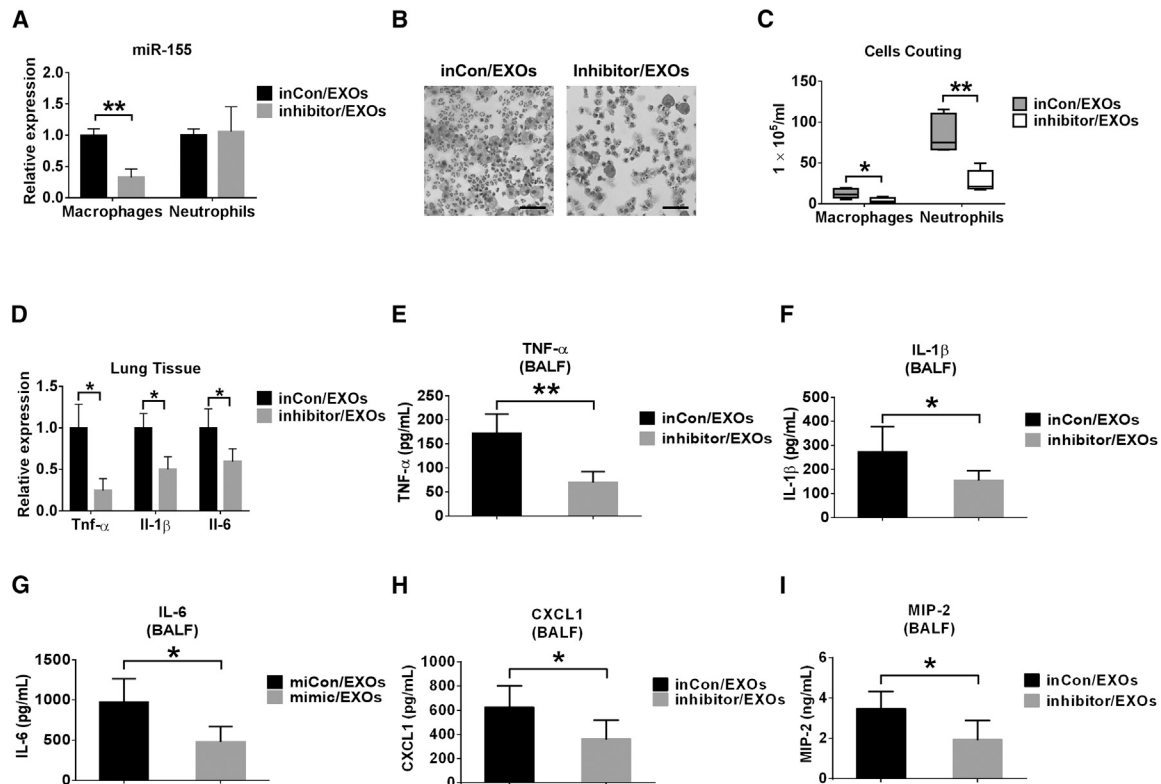

**Figure 6. Delivery of miRNA Inhibitor via Serum EXOs**

(A–I) Mice were pretreated with 1  $\mu$ g LPS intratracheally. After 3 hr, 100  $\mu$ g serum EXOs transfected with 100 pmol inhibitor control (inCon/EXOs) or miR-155 inhibitor (inhibitor/EXOs) were given to each mouse ( $n = 4$ –6 for each group). 24 hr later, the level of miR-155 was detected in sorted macrophages and neutrophils from BALF cells (A). H&E staining was performed using BALF cells (B). Scale bars, 50  $\mu$ m. The number of macrophages or neutrophils in BALF was counted (C). Relative mRNA levels of TNF- $\alpha$ , IL-1 $\beta$ , and IL-6 in the lung were measured (D). The secretion of TNF- $\alpha$  (E), IL-1 $\beta$  (F), IL-6 (G), CXCL1 (H), and MIP-2 (I) was detected using ELISA. Results represent means  $\pm$  SD. \* $p < 0.05$ , \*\* $p < 0.01$ .

## MATERIALS AND METHODS

### Animals, Cell Culture, and Isolation of AMs and Polymorphonuclear Leukocytes

WT C57BL/6 mice of both genders (8 weeks of age) were obtained from The Jackson Laboratory (Maine, USA). To induce inflammation in the lung, mice were given 1  $\mu$ g LPS (Sigma, St. Louis, MO) i.t. 3 hr before EXO administration. All the protocols involving animals in this study were approved by the institutional animal care and use committee (IACUC) of Boston University.

Cell lines Beas2B, A549, MRC-5, J774A.1, MH-S, and THP-1 were obtained from the ATCC (Manassas, VA) and cultured according to the standard protocol provided by the ATCC. E-10 and MLE-15 cells were a gift from Dr. Mizgerd at Boston University and maintained as described previously.<sup>46,47</sup> Isolation of mouse polymorphonuclear leukocytes (PMNs) from blood was performed as described previously<sup>47</sup> using Percoll density gradient centrifugation (Sigma, St. Louis, MO). The method used for isolation of murine AMs was described previously.<sup>28</sup> Briefly, after tracheostomy, 2 mL (1 mL  $\times$  2) of PBS was used to lavage total mouse lungs, and BALF was obtained. BALF cells were collected after centrifugation at

400  $\times$  g for 10 min. All cells were cultured at 37°C in a humidified atmosphere of 5% CO<sub>2</sub> and 95% air.

### RNA Preparation, Reverse Transcription, and Real-Time qPCR

MiRNeasy Mini Kits (QIAGEN, Valencia, CA) were used for purification of total RNA from tissues and cells. Single-stranded cDNA was generated according to the manuals of the High-Capacity cDNA Reverse Transcription Kit (Thermo Fisher Scientific, Waltham, MA). For miR-15a and miR-155 detection, real-time PCR was performed using a TaqMan PCR kit (Thermo Fisher Scientific, Waltham, MA) and the Applied Biosystems StepOnePlus real-time PCR system. Mouse Hprt (Thermo Fisher Scientific, Waltham, MA) was used as a normalization control.

### Copy Number Analysis

The copy numbers of siRNA molecules were calculated using real-time PCR based on the absolute quantification method, as described previously.<sup>48,49</sup> To make a standard curve, 1 ng of synthetic control siRNA or Myd88 siRNA was used for the reaction of poly(A)-tailed reverse transcription, as described previously.<sup>50,51</sup> Standard curves were made with these cDNA samples via serial dilutions and then

used to determine the copy number in each sample. siRNA-specific primers and the universal reverse primer used in the real-time PCR were as follows:

Control siRNA primer: 5'-GAACACAGAATACGUCTGAATT AAC-3'

Myd88 siRNA primer: 5'-UGUAGAUAUUCGUCAGAAACAA CCA-3'

Universal reverse primer: 5'-CGAATTCTAGAGCTCGAGGC AGG-3'.

### Serum EXO Isolation and Labeling

Serum EXOs were isolated according to the manufacturer's protocol (Thermo Fisher Scientific, Waltham, MA). PKH26 and PKH67 Fluorescent Cell Linker Kits for General Cell Membrane Labeling (Sigma, St. Louis, MO) were purchased and used according to the manufacturer's protocol. The EXO-GLOW Exosome Labeling Kit (System Biosciences, Palo Alto, CA) was also used for serum EXO labeling, following the manufacturer's protocol.

### TEM, DLS, and NTA

For TEM, an EXO preparation kit for TEM imaging was obtained from 101Bio (Palo Alto, CA). The TEM images were taken using a Philips CM120 electron microscope. DLS (Brookhaven 90plus Nano-particle Sizer) was performed to determine the average EXO size. NTA was performed to determine the size and concentration of serum EXOs. NTA data were obtained using NanoSight NS500 at the Nanomedicines Characterization Core Facility (University of North Carolina at Chapel Hill, Chapel Hill, NC).

### Preparation of Small RNA-Loaded EXOs and Delivery of Serum EXOs *In Vivo* and *In Vitro*

Both the control siRNA (5'-GAACACAGAAUACGUCUGAA UUAAC-3') and Myd88 siRNA (5'-UGUAGAUAUUCGUCAGAA ACAACCA-3') used in the study were ordered from Integrated DNA Technologies (Coralville, IA). All siRNAs were synthesized with a 3'-UU overhang on each strand. The mimic control (catalog no. HMC0002), miR-15a mimic (catalog no. HMI0256), inhibitor control (catalog no. NCSTUD001), and miR-155 inhibitor (catalog no. HSTUD0254) were purchased from Sigma-Aldrich (St. Louis, MO). Modified calcium-mediated transfection was used to introduce small RNAs, including siMyd88, the miR-15a mimic, and the miR-155 inhibitor, and their respective controls into serum EXOs.<sup>28</sup> To deliver small RNAs into serum EXOs, 100 pmol small RNA was loaded into 100  $\mu$ g serum EXOs quantified by protein content (about  $6.0 \times 10^{10}$  particles). The final volume was adjusted to 200  $\mu$ L using sterile PBS. To wash the serum EXOs, ExoQuick (System Biosciences, Palo Alto, CA) was used according to the user manual provided.

For *in vivo* experiments, different numbers of EXOs in 50  $\mu$ L PBS were *i.t.* instilled into the mouse lung. One day after instillation, mice were sacrificed, and inflammation in the lung was evaluated.

For *in vitro* experiments, serum EXOs were added to a cell culture dish containing  $1.0 \times 10^6$  cells with 10% EXO-depleted fetal bovine serum (FBS) (System Biosciences, Palo Alto, CA). The time and dose are indicated in each figure.

### Cytotoxicity and Cell Sorting Using Flow Cytometry

Cytotoxicity was detected 12 hr after EXO treatment using a cytotoxicity detection kit (Sigma, St. Louis, MO). Macrophages (CD11c<sup>+</sup> F4/80<sup>+</sup>) and neutrophils (CD11b<sup>+</sup> Ly6G<sup>+</sup>) were sorted from BALF cells at the Boston University Medical Campus (BUMC) Flow Cytometry Core Facility using antibodies purchased from BioLegend (San Diego, CA).

### Immunofluorescence and H&E Staining

For cytospin preparations, the cell suspension was cytocentrifuged at  $300 \times g$  for 5 min using a Shandon Cytospin 4 (Thermo Fisher Scientific, Waltham, MA). Total inflammatory cell counts in the BALF were determined using a hemocytometer as described previously.<sup>52</sup> BALF cells and lung sections were air-dried and stained with PROTOCOL Hema 3 fixative and solutions (Thermo Fisher Scientific, Waltham, MA).

To identify cell types in the lung that take up EXOs labeled with PKH26, immunofluorescence staining was performed as described previously.<sup>28</sup> BALF cells or lung sections were briefly incubated overnight at 4°C with an antibody against mouse CD68 (Santa Cruz Biotechnology, Dallas, TX) as a marker of macrophages or the Ly-6G antibody (BD Biosciences, San Jose, CA) as a marker of granulocytes. After washing, Alexa 488-conjugated secondary antibodies (Thermo Fisher Scientific, Waltham, MA) were applied. Nuclei were counterstained with DAPI. Images of the stained BALF cells and lung sections were visualized and captured using a fluorescence microscope (Axioplan-2, Zeiss, Oberkochen, Germany), a high-speed 5-megapixel microscope camera (AxioCam, Zeiss, Oberkochen, Germany), and a software package (AxioVision, Zeiss, Oberkochen, Germany) with an N-Achroplan 20 $\times$ /0.45 (Zeiss, Oberkochen, Germany) objective lens.

### Western Blot Analysis, ELISA, and Mouse Cytokine Array

Western blot analysis was performed as described previously.<sup>50</sup> In brief, cells were homogenized in radioimmunoprecipitation analysis (RIPA) lysis buffer supplemented with protease inhibitor cocktail and phosphatase inhibitor cocktail (Sigma, St. Louis, MO). Protein lysates were resolved on SDS-PAGE gels before being transferred to a polyvinylidene difluoride (PVDF) membrane (EMD Millipore, Darmstadt, Germany). CD41 and CD235a antibodies were purchased from Santa Cruz Biotechnology (Dallas, TX). CD31 and CD45 antibodies were ordered from BD Biosciences (San Jose, CA). Anti-E-cadherin and anti-CD61 were ordered from Cell Signaling Technology (Danvers, MA).

To quantify the cytokine and chemokine amounts in BALF, TNF- $\alpha$ , IL-1 $\beta$ , IL-6, CXCL1, and MIP-2, ELISA kits (R&D Systems) were used according to the manufacturer's protocol.

The Mouse Cytokine Array C1 Kit (RayBiotech, Norcross, GA) was obtained to determine the levels of cytokines in BALF collected from mice according to the standard protocol.

### Statistical Analysis

All data were presented as means  $\pm$  SD. All the data from three independent experiments were averaged before normalization. For real-time qPCR, the same amount of cDNA was used, and all data were analyzed at the same time. Comparisons between 2 groups were performed using a two-tailed unpaired Student's *t* test. Multiple groups were compared using a one-way ANOVA with the Tukey method.  $p < 0.05$  was considered statistically significant.

### SUPPLEMENTAL INFORMATION

Supplemental Information includes three figures and can be found with this article online at <https://doi.org/10.1016/j.ymthe.2018.06.007>.

### AUTHOR CONTRIBUTIONS

D.Z., H.L., X.W., and Y.J. designed the research. D.Z. performed the research. D.Z., A.R., M.G., and Y.J. analyzed data and wrote the paper.

### CONFLICTS OF INTEREST

The authors declare no conflicts of interest.

### ACKNOWLEDGMENTS

This work was supported by the NIH (R01GM127596 to Y.J., R21AI121644 and R33AI121644 to Y.J., R01GM111313 to Y.J., and K99HL141685 to D.Z.). Funding for the open access charge was provided by the NIH.

### REFERENCES

1. Tkach, M., and Théry, C. (2016). Communication by Extracellular Vesicles: Where We Are and Where We Need to Go. *Cell* 164, 1226–1232.
2. Pitt, J.M., Kroemer, G., and Zitvogel, L. (2016). Extracellular vesicles: masters of intercellular communication and potential clinical interventions. *J. Clin. Invest.* 126, 1139–1143.
3. Raposo, G., and Stoorvogel, W. (2013). Extracellular vesicles: exosomes, microvesicles, and friends. *J. Cell Biol.* 200, 373–383.
4. Andalussi, S. El, Mäger, I., Breakefield, X.O., and Wood, M.J. (2013). Extracellular vesicles: biology and emerging therapeutic opportunities. *Nat. Rev. Drug Discov.* 12, 347–357.
5. Johnsen, K.B., Gudbergsson, J.M., Skov, M.N., Pilgaard, L., Moos, T., and Duroux, M. (2014). A comprehensive overview of exosomes as drug delivery vehicles - endogenous nanocarriers for targeted cancer therapy. *Biochim. Biophys. Acta* 1846, 75–87.
6. Lamichhane, T.N., Raiker, R.S., and Jay, S.M. (2015). Exogenous DNA Loading into Extracellular Vesicles via Electroporation is Size-Dependent and Enables Limited Gene Delivery. *Mol. Pharm.* 12, 3650–3657.
7. Hessvik, N.P., and Llorente, A. (2018). Current knowledge on exosome biogenesis and release. *Cell. Mol. Life Sci.* 75, 193–208.
8. Ha, D., Yang, N., and Nadithe, V. (2016). Exosomes as therapeutic drug carriers and delivery vehicles across biological membranes: current perspectives and future challenges. *Acta Pharm. Sin. B* 6, 287–296.
9. Lares, M.R., Rossi, J.J., and Ouellet, D.L. (2010). RNAi and small interfering RNAs in human disease therapeutic applications. *Trends Biotechnol.* 28, 570–579.
10. Wittrop, A., and Lieberman, J. (2015). Knocking down disease: a progress report on siRNA therapeutics. *Nat. Rev. Genet.* 16, 543–552.
11. Broderick, J.A., and Zamore, P.D. (2011). MicroRNA therapeutics. *Gene Ther.* 18, 1104–1110.
12. Christopher, A.F., Kaur, R.P., Kaur, G., Kaur, A., Gupta, V., and Bansal, P. (2016). MicroRNA therapeutics: Discovering novel targets and developing specific therapy. *Perspect. Clin. Res.* 7, 68–74.
13. Carthew, R.W., and Sontheimer, E.J. (2009). Origins and Mechanisms of miRNAs and siRNAs. *Cell* 136, 642–655.
14. Agrawal, N., Dasaradhi, P.V., Mohammed, A., Malhotra, P., Bhatnagar, R.K., and Mukherjee, S.K. (2003). RNA interference: biology, mechanism, and applications. *Microbiol. Mol. Biol. Rev.* 67, 657–685.
15. Rand, T.A., Petersen, S., Du, F., and Wang, X. (2005). Argonaute2 cleaves the anti-guide strand of siRNA during RISC activation. *Cell* 123, 621–629.
16. Lam, J.K., Chow, M.Y., Zhang, Y., and Leung, S.W. (2015). siRNA Versus miRNA as Therapeutics for Gene Silencing. *Mol. Ther. Nucleic Acids* 4, e252.
17. Zuckerman, J.E., and Davis, M.E. (2015). Clinical experiences with systemically administered siRNA-based therapeutics in cancer. *Nat. Rev. Drug Discov.* 14, 843–856.
18. Rupaimoole, R., and Slack, F.J. (2017). MicroRNA therapeutics: towards a new era for the management of cancer and other diseases. *Nat. Rev. Drug Discov.* 16, 203–222.
19. Sakagami, M. (2006). In vivo, in vitro and ex vivo models to assess pulmonary absorption and disposition of inhaled therapeutics for systemic delivery. *Adv. Drug Deliv. Rev.* 58, 1030–1060.
20. Patil, J.S., and Sarasija, S. (2012). Pulmonary drug delivery strategies: A concise, systematic review. *Lung India* 29, 44–49.
21. Lötvall, J., Hill, A.F., Hochberg, F., Buzás, E.I., Di Vizio, D., Gardiner, C., Gho, Y.S., Kurochkin, I.V., Mathivanan, S., Quesenberry, P., et al. (2014). Minimal experimental requirements for definition of extracellular vesicles and their functions: a position statement from the International Society for Extracellular Vesicles. *J. Extracell. Vesicles* 3, 26913.
22. Helwa, I., Cai, J., Drewry, M.D., Zimmerman, A., Dinkins, M.B., Khaled, M.L., Seremwe, M., Dismuke, W.M., Bieberich, E., Stamer, W.D., et al. (2017). A Comparative Study of Serum Exosome Isolation Using Differential Ultracentrifugation and Three Commercial Reagents. *PLoS ONE* 12, e0170628.
23. Li, L., Bennett, S.A., and Wang, L. (2012). Role of E-cadherin and other cell adhesion molecules in survival and differentiation of human pluripotent stem cells. *Cell Adhes. Migr.* 6, 59–70.
24. Pelikan, Z. (2014). Expression of surface markers on the blood cells during the delayed asthmatic response to allergen challenge. *Allergy Rhinol. (Providence)* 5, 96–109.
25. Sabatel, C., Radermecker, C., Fievez, L., Paulissen, G., Chakarov, S., Fernandes, C., Olivier, S., Toussaint, M., Pirottin, D., Xiao, X., et al. (2017). Exposure to Bacterial CpG DNA Protects from Airway Allergic Inflammation by Expanding Regulatory Lung Interstitial Macrophages. *Immunity* 46, 457–473.
26. Reutershan, J., Morris, M.A., Burcin, T.L., Smith, D.F., Chang, D., Saprito, M.S., and Ley, K. (2006). Critical role of endothelial CXCR2 in LPS-induced neutrophil migration into the lung. *J. Clin. Invest.* 116, 695–702.
27. Kawasaki, T., and Kawai, T. (2014). Toll-like receptor signaling pathways. *Front. Immunol.* 5, 461.
28. Zhang, D., Lee, H., Zhu, Z., Minhas, J.K., and Jin, Y. (2017). Enrichment of selective miRNAs in exosomes and delivery of exosomal miRNAs in vitro and in vivo. *J. Physiol. Lung Cell. Mol. Physiol.* 312, L110–L121.
29. Haney, M.J., Klyachko, N.L., Zhao, Y., Gupta, R., Plotnikova, E.G., He, Z., Patel, T., Piroyan, A., Sokolsky, M., Kabanov, A.V., and Batrakova, E.V. (2015). Exosomes as drug delivery vehicles for Parkinson's disease therapy. *J. Control. Release* 207, 18–30.
30. Luan, X., Sansanaphongpricha, K., Myers, I., Chen, H., Yuan, H., and Sun, D. (2017). Engineering exosomes as refined biological nanoplateforms for drug delivery. *Acta Pharmacol. Sin.* 38, 754–763.
31. Moon, H.G., Yang, J., Zheng, Y., and Jin, Y. (2014). miR-15a/16 regulates macrophage phagocytosis after bacterial infection. *J. Immunol.* 193, 4558–4567.

32. Xu, F., Kang, Y., Zhang, H., Piao, Z., Yin, H., Diao, R., Xia, J., and Shi, L. (2013). Akt1-mediated regulation of macrophage polarization in a murine model of *Staphylococcus aureus* pulmonary infection. *J. Infect. Dis.* *208*, 528–538.
33. O'Connell, R.M., Chaudhuri, A.A., Rao, D.S., and Baltimore, D. (2009). Inositol phosphatase SHIP1 is a primary target of miR-155. *Proc. Natl. Acad. Sci. USA* *106*, 7113–7118.
34. Wood, M.J., O'Loughlin, A.J., and Samira, L. (2011). Exosomes and the blood-brain barrier: implications for neurological diseases. *Ther. Deliv.* *2*, 1095–1099.
35. Tan, S., Wu, T., Zhang, D., and Zhang, Z. (2015). Cell or cell membrane-based drug delivery systems. *Theranostics* *5*, 863–881.
36. Matsumoto, J., Stewart, T., Banks, W.A., and Zhang, J. (2017). The transport mechanism of extracellular vesicles at the blood-brain barrier. *Curr. Pharm. Des.* *23*, 6206–6214.
37. Mudshinge, S.R., Deore, A.B., Patil, S., and Bhalgat, C.M. (2011). Nanoparticles: Emerging carriers for drug delivery. *Saudi Pharm. J.* *19*, 129–141.
38. Naseri, N., Valizadeh, H., and Zakeri-Milani, P. (2015). Solid Lipid Nanoparticles and Nanostructured Lipid Carriers: Structure, Preparation and Application. *Adv. Pharm. Bull.* *5*, 305–313.
39. Paranjpe, M., and Müller-Goymann, C.C. (2014). Nanoparticle-mediated pulmonary drug delivery: a review. *Int. J. Mol. Sci.* *15*, 5852–5873.
40. Fernández Tena, A., and Casan Clarà, P. (2012). Deposition of inhaled particles in the lungs. *Arch. Bronconeumol.* *48*, 240–246.
41. Sercombe, L., Veerati, T., Moheimani, F., Wu, S.Y., Sood, A.K., and Hua, S. (2015). Advances and Challenges of Liposome Assisted Drug Delivery. *Front. Pharmacol.* *6*, 286.
42. Bozzuto, G., and Molinari, A. (2015). Liposomes as nanomedical devices. *Int. J. Nanomedicine* *10*, 975–999.
43. Kelly, C., Jefferies, C., and Cryan, S.A. (2011). Targeted liposomal drug delivery to monocytes and macrophages. *J. Drug Deliv.* *2011*, 727241.
44. Imai, T., Takahashi, Y., Nishikawa, M., Kato, K., Morishita, M., Yamashita, T., Matsumoto, A., Charoenviriyakul, C., and Takakura, Y. (2015). Macrophage-dependent clearance of systemically administered B16BL6-derived exosomes from the blood circulation in mice. *J. Extracell. Vesicles* *4*, 26238.
45. Yamamoto, K., Ferrari, J.D., Cao, Y., Ramirez, M.L., Jones, M.R., Quinton, L.J., and Mizgerd, J.P. (2012). Type I alveolar epithelial cells mount innate immune responses during pneumococcal pneumonia. *J. Immunol.* *189*, 2450–2459.
46. Wikenheiser, K.A., Vorbroke, D.K., Rice, W.R., Clark, J.C., Bachurski, C.J., Oie, H.K., and Whitsett, J.A. (1993). Production of immortalized distal respiratory epithelial cell lines from surfactant protein C/simian virus 40 large tumor antigen transgenic mice. *Proc. Natl. Acad. Sci. USA* *90*, 11029–11033.
47. Swamydas, M., Luo, Y., Dorf, M.E., and Lionakis, M.S. (2015). Isolation of mouse neutrophils. *Curr. Protoc. Immunol.* *110*, 3.20.1–3.20.15.
48. Chevillet, J.R., Kang, Q., Ruf, I.K., Briggs, H.A., Vojtech, L.N., Hughes, S.M., Cheng, H.H., Arroyo, J.D., Meredith, E.K., Gallichotte, E.N., et al. (2014). Quantitative and stoichiometric analysis of the microRNA content of exosomes. *Proc. Natl. Acad. Sci. USA* *111*, 14888–14893.
49. Alexander, M., Hu, R., Runtsch, M.C., Kagele, D.A., Mosbrugger, T.L., Tolmachova, T., Seabra, M.C., Round, J.L., Ward, D.M., and O'Connell, R.M. (2015). Exosome-delivered microRNAs modulate the inflammatory response to endotoxin. *Nat. Commun.* *6*, 7321.
50. Zhang, D., Li, X., Chen, C., Li, Y., Zhao, L., Jing, Y., Liu, W., Wang, X., Zhang, Y., Xia, H., et al. (2012). Attenuation of p38-mediated miR-1/133 expression facilitates myoblast proliferation during the early stage of muscle regeneration. *PLoS ONE* *7*, e41478.
51. Lee, H., Zhang, D., Wu, J., Otterbein, L.E., and Jin, Y. (2017). Lung Epithelial Cell-Derived Microvesicles Regulate Macrophage Migration via MicroRNA-17/221-Induced Integrin  $\beta_1$  Recycling. *J. Immunol.* *199*, 1453–1464.
52. Zhang, D., Lee, H., Haspel, J.A., and Jin, Y. (2017). Long noncoding RNA FOXD3-AS1 regulates oxidative stress-induced apoptosis *via* sponging microRNA-150. *FASEB J.* *31*, 4472–4481.

**YMTHE, Volume 26**

**Supplemental Information**

**Exosome-Mediated Small RNA Delivery:  
A Novel Therapeutic Approach for Inflammatory  
Lung Responses**

**Duo Zhang, Heedoo Lee, Xiaoyun Wang, Ashish Rai, Michael Groot, and Yang Jin**

## Supplemental Figures

### Figure S1

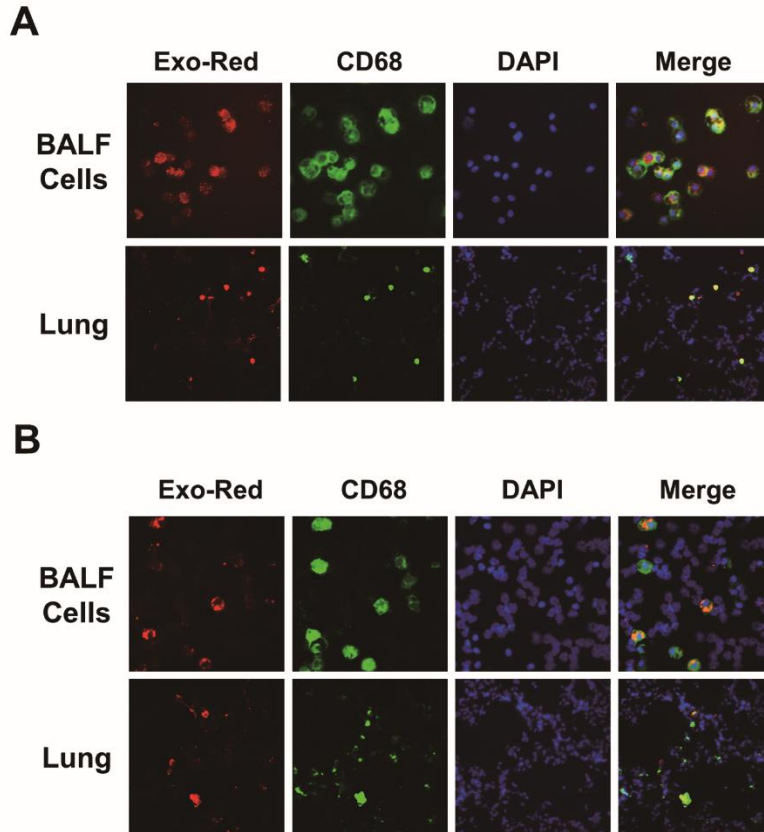

**Figure S1. Distribution of Exo-Red labeled serum EXOs after intratracheal instillation.**

(A and B) Purified serum EXOs (100  $\mu$ g in 50  $\mu$ L PBS) labeled with Exo-Red were administered to non-pretreated mice (A) or LPS pretreated mice (B) intratracheally (n = 4 for each group). Mice were sacrificed 24 hours after EXOs administration. Immunofluorescent staining of macrophages was performed in BALF cells and lungs sections using an antibody against CD68. The nuclei were stained with DAPI.

Figure S2

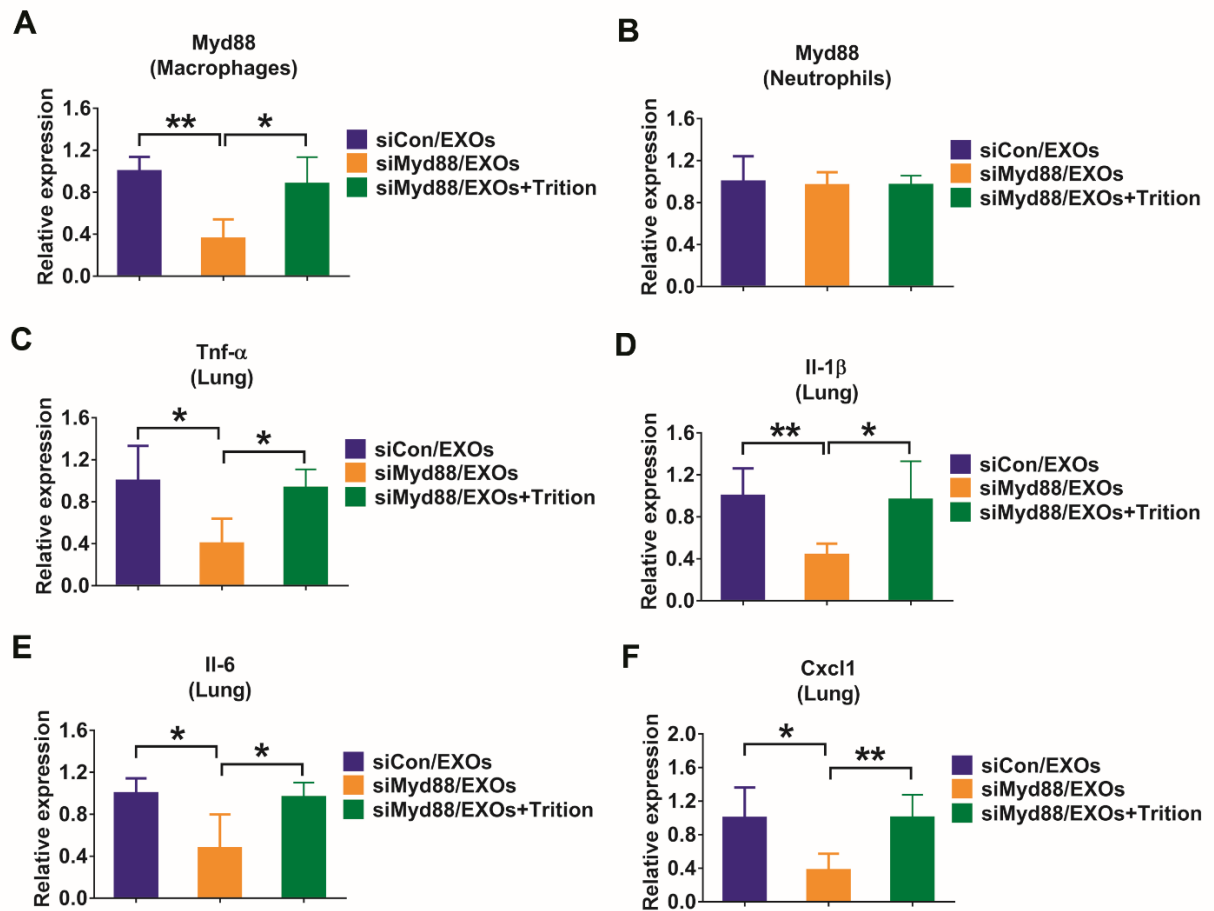

**Figure S2. The integrity of serum EXOs are crucial for siRNA/miRNA delivery.**

(A-F) Mice were pretreated with 1  $\mu$ g LPS intratracheally. After 3 hours, 100  $\mu$ g intact serum EXOs transfected with 100 pmol siRNA control (siCon/EXOs), Myd88 siRNA (siMyd88/EXOs) or 100  $\mu$ g 0.075% Triton X-100 pre-lysed EXOs transfected with 100 pmol Myd88 siRNA (siMyd88/EXOs+Triton) were given to each mouse (n=5 for each group). 24 hours later, the level of Myd88 was detected in sorted macrophages (A) and neutrophils (B) from BALF cells. Relative mRNA levels of TNF- $\alpha$  (C), Il-1 $\beta$  (D), Il-6 (E) and Cxcl1 (F) in the lung were measured. Results represent means  $\pm$  SD. \* $P$  < 0.05, \*\* $P$  < 0.01.

**Figure S3**

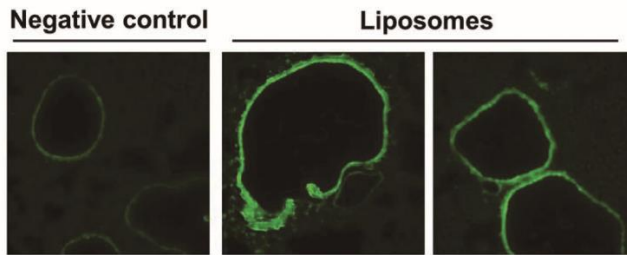

**Figure S3. Distribution of liposomes after intratracheal instillation.**

Liposomes were generated using Lipofectamine 2000 reagent and labeled with fluorescent dye. Immunofluorescent pictures showing the distribution of liposomes in murine lungs were taken using fluorescence microscopy 24 hours after intratracheal instillation.
